# Supplementary material for: Single-cell analysis of diverse immune phenotypes in malignant pleural effusion
Source: PubMed Central journal article supplement (PMC8602344; doi:10.1038/s41467-021-27026-9), 2021-11-18
Supplement: 41467_2021_27026_MOESM1_ESM.pdf [file 41467_2021_27026_MOESM1_ESM.pdf]

# Single-cell analysis of diverse immune phenotypes in malignant pleural effusion

Short running head: Immune Cells in Pleural Malignancy

Zhong-Yin Huang<sup>1†</sup>, Ming-Ming Shao<sup>1†</sup>, Jian-Chu Zhang<sup>2†</sup>, Feng-Shuang Yi<sup>1</sup>, Juan Du<sup>1</sup>, Qiong Zhou<sup>2</sup>, Feng-Yao Wu<sup>3</sup>, Sha Li<sup>3</sup>, Wei Li<sup>3</sup>, Xian-Zhen Huang<sup>3</sup>, Kan Zhai<sup>1\*</sup>, Huan-Zhong Shi<sup>1\*</sup>

<sup>1</sup>Department of Respiratory and Critical Care Medicine, Beijing Institute of Respiratory Medicine and Beijing Chao-Yang Hospital, Capital Medical University, Beijing 100020, China; <sup>2</sup>Department of Respiratory and Critical Care Medicine, Union Hospital, Tongji Medical College, Huazhong University of Science and Technology, Wuhan, China; <sup>3</sup>Department of Tuberculosis, Nanning Fourth People's Hospital, Nanning 530022, China

\*Corresponding author. Email: shihuanzhong@sina.com (H.Z.S.); zhaikan@ccmu.edu.cn (K.Z.)

†These authors contributed equally to this work.

Supplementary Fig. 1. Single-cell transcriptional profiling of immune cells from MPE and blood.

Supplementary Fig. 2. Single-cell transcriptional profiling of T cells from MPE and blood.

Supplementary Fig. 3. Single-cell transcriptional profiling of B cells from MPE and blood.

Supplementary Fig. 4. Clonal expansion of B cells defined by BCR.

Supplementary Fig. 5. Single-cell transcriptional profiling of myeloid cells from MPE and blood.

Supplementary Fig. 6. Metabolic heterogeneity in MPE and blood.

Supplementary Fig. 7. Cell-type specificity of genes associated with non-small cell lung cancer susceptibility in immune cells from MPE and blood using scRNA-seq.

Supplementary Fig. 8. Survival analysis for signature genes of 15 cell types in TCGA LUAD data.

Supplementary Fig. 9. Proportion of cell types in TCGA LUAD data.

Supplementary Table 1. Metric information for five MPE patients induced by lung adenocarcinoma.

Supplementary Table 2. Gene list in genome-wide association studies related analysis.

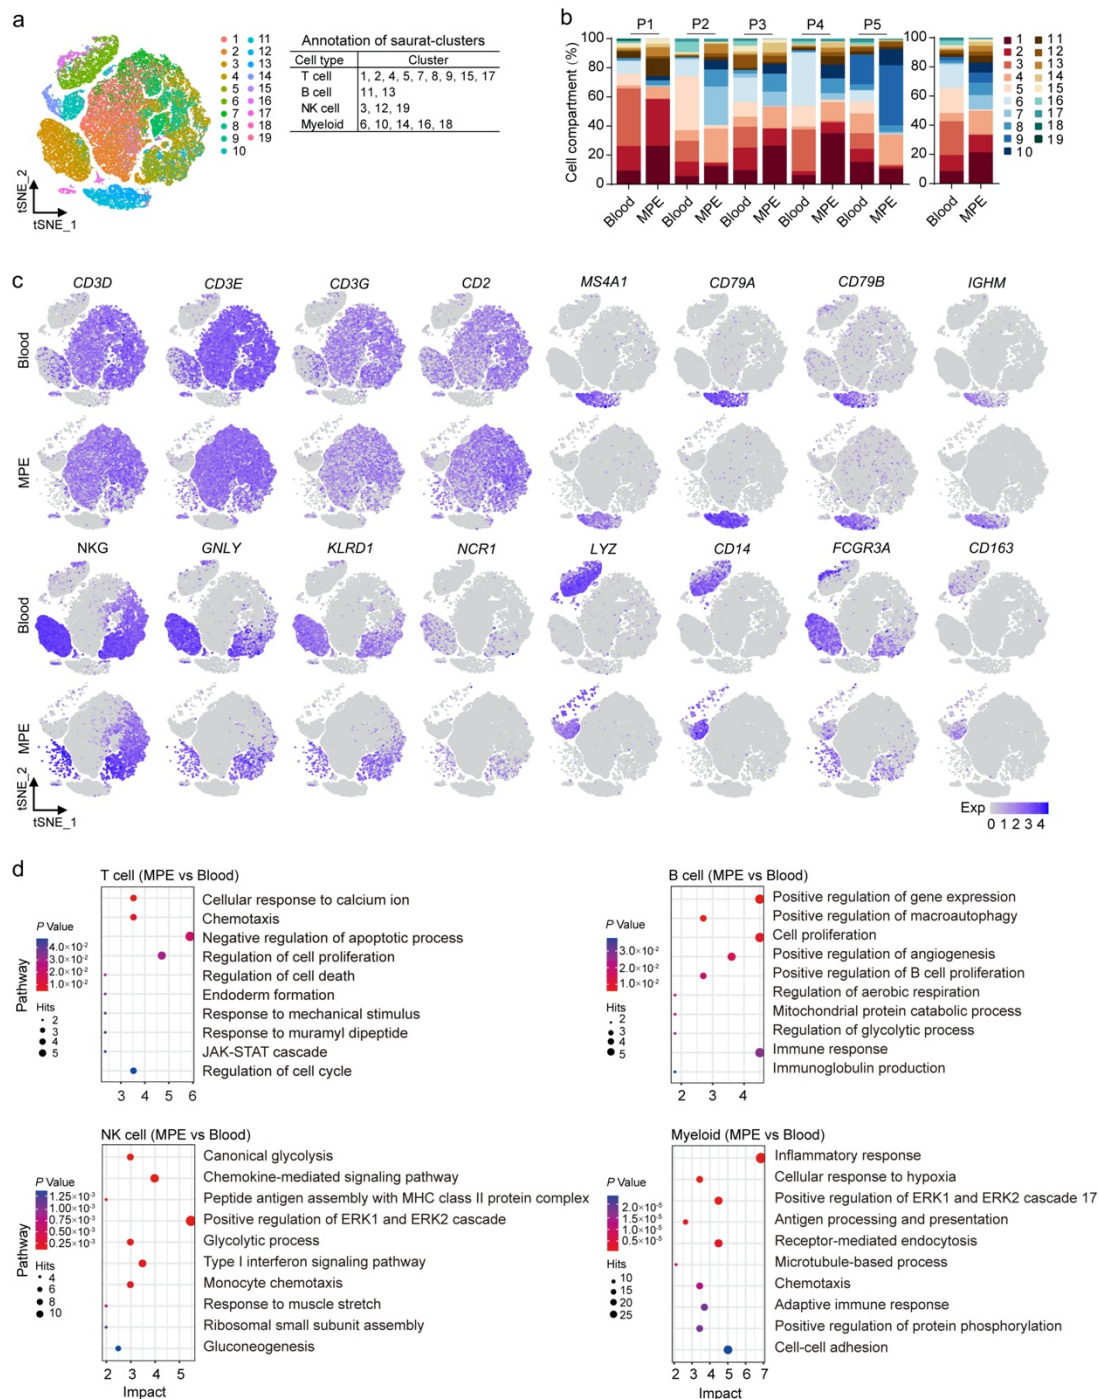

**Supplementary Fig. 1. Single-cell transcriptional profiling of immune cells from MPE and blood.** **a**, tSNE plots of total cells and annotation of saurat-clusters with cell types. **b**, Average proportion of each saurat-cluster derived from each patient (left panel), and malignant pleural effusion (MPE) or blood (right panel). **c**, Canonical cell markers for the immune cell types defined in Figure 1b. Data are colored according to expression levels. **d**, Gene Ontology (GO) enrichment analysis using genes upregulated in MPE compared with blood for each cell type. The significance was by Fisher's exact test and adjusted by Benjamini-Hochberg correction.

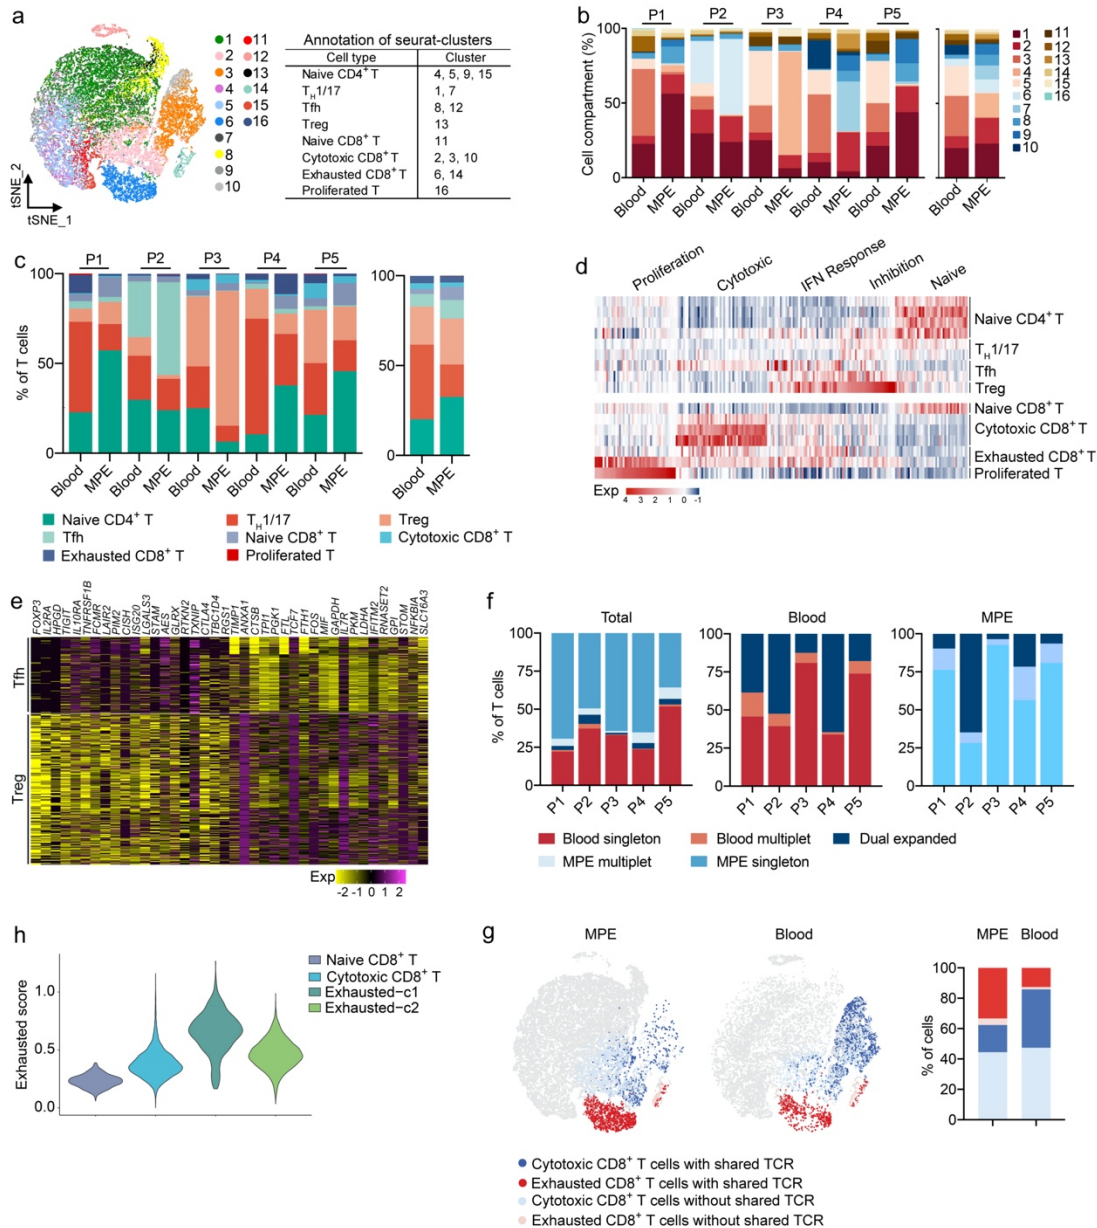

**Supplementary Fig. 2. Single-cell transcriptional profiling of T cells from MPE and blood.** **a**, tSNE plots of T cells and annotation of seurat-clusters with cell subtypes. **b**, Average proportion of each seurat-cluster derived from each patient (left panel), and MPE or blood (right panel). **c**, Average proportion of each cell subset derived from each patient (left panel), and MPE or blood (right panel). **d**, Heatmap of selected differentially expressed genes in each cell subset. **e**, Heatmap of differentially expressed genes of Treg cells in comparison with Tfh cells in MPE. **f**, Fraction of the clonotype fraction and cell fraction. Bar plot shows the clonotype fraction in total cells (left panel) and the cell fraction in blood (middle panel) and MPE (right panel) for each patient. **g**, Visualization of T cell receptor (TCR) clonotypes both identified in Cytotoxic CD8<sup>+</sup> T cells and Exhausted CD8<sup>+</sup> T cells. Left panel: tSNE plots of

the Cytotoxic CD8<sup>+</sup> T cells and Exhausted CD8<sup>+</sup> T cells. Shared TCR means TCR shared in Cytotoxic CD8<sup>+</sup> T cells and Exhausted CD8<sup>+</sup> T cells. Right panel: Fraction of the cell TCR status in Cytotoxic CD8<sup>+</sup> T cells and Exhausted CD8<sup>+</sup> T cells. **h**, Violin plot of exhausted score for each cells cluster in CD8<sup>+</sup> T cells.

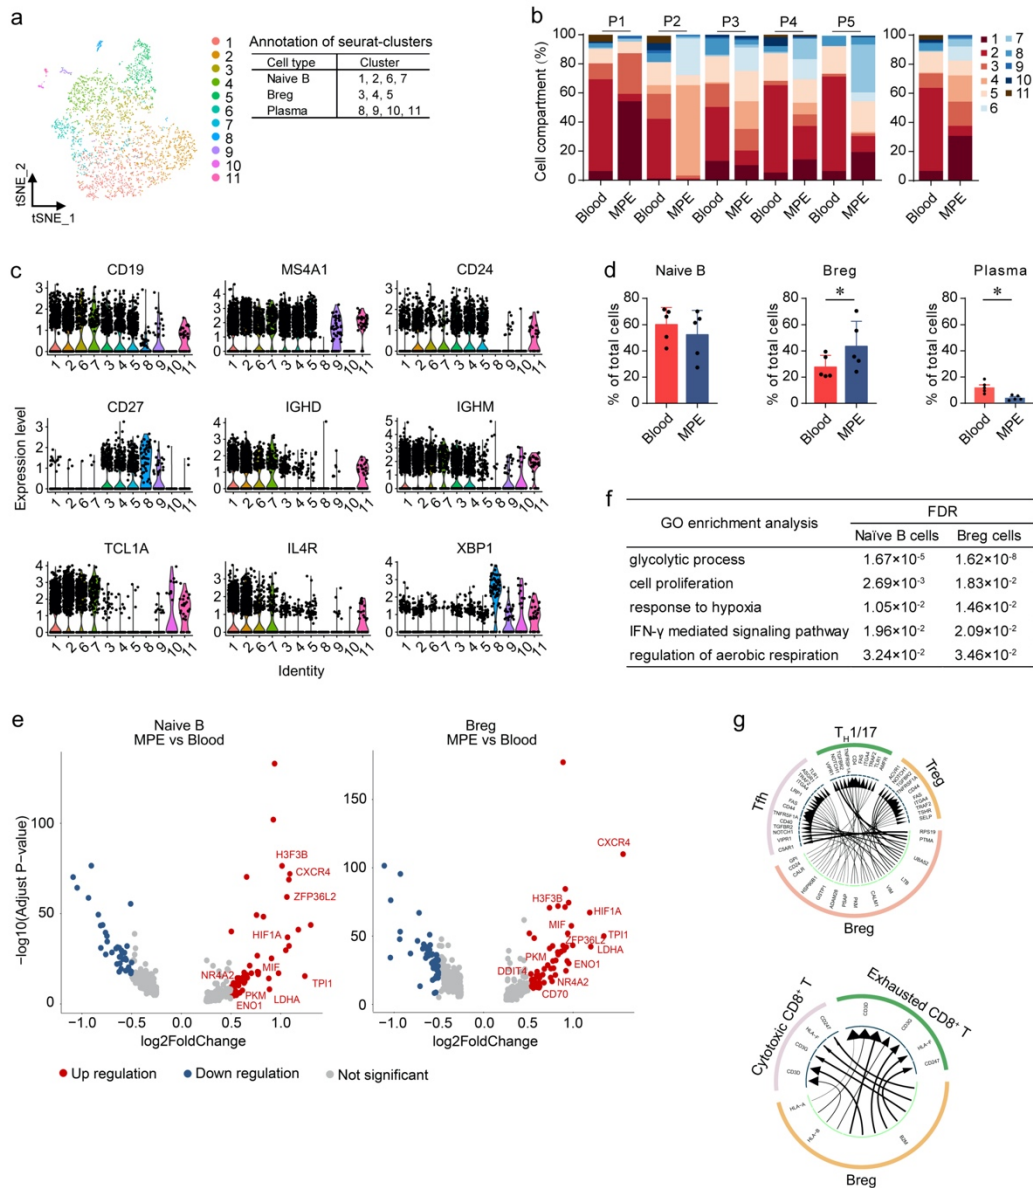

**Supplementary Fig. 3. Single-cell transcriptional profiling of B cells from MPE and blood.** **a**, tSNE plots of B cells and annotation of seurat-clusters with cell subtypes. **b**, Average proportion of each seurat-cluster derived from each patient (left panel), and MPE or blood (right panel). **c**, Violin plot of canonical marker genes for B cells in each cell subset. X-axis: seurat-clusters in Figure 3a. **d**, Frequencies of B cells types in MPE and blood according to the t-SNE plot using scRNA-seq data. Data are presented as mean  $\pm$  SD. Comparisons were made using two tailed paired Student's *t*-test. Blood,  $n = 5$  samples, MPE,  $n = 5$  samples. **e**, Scatter plot of differently expressed genes of the MPE and blood in Naïve B cells (left panel) and Bregs (right panel). **f**, GO enrichment analysis of differentially express genes between MPE and blood samples in Breg cells or Naïve B cells. The significance was by Fisher's exact test and adjusted by Benjamini-Hochberg correction. **g**, The predicted interactions of Breg cells and CD4<sup>+</sup> T cells (T<sub>H</sub>1/17, Treg and Tfh; left panel) or CD8<sup>+</sup> T cells (cytotoxic CD8<sup>+</sup> T and exhausted CD8<sup>+</sup> T; right panel) mediated by ligand and receptor.

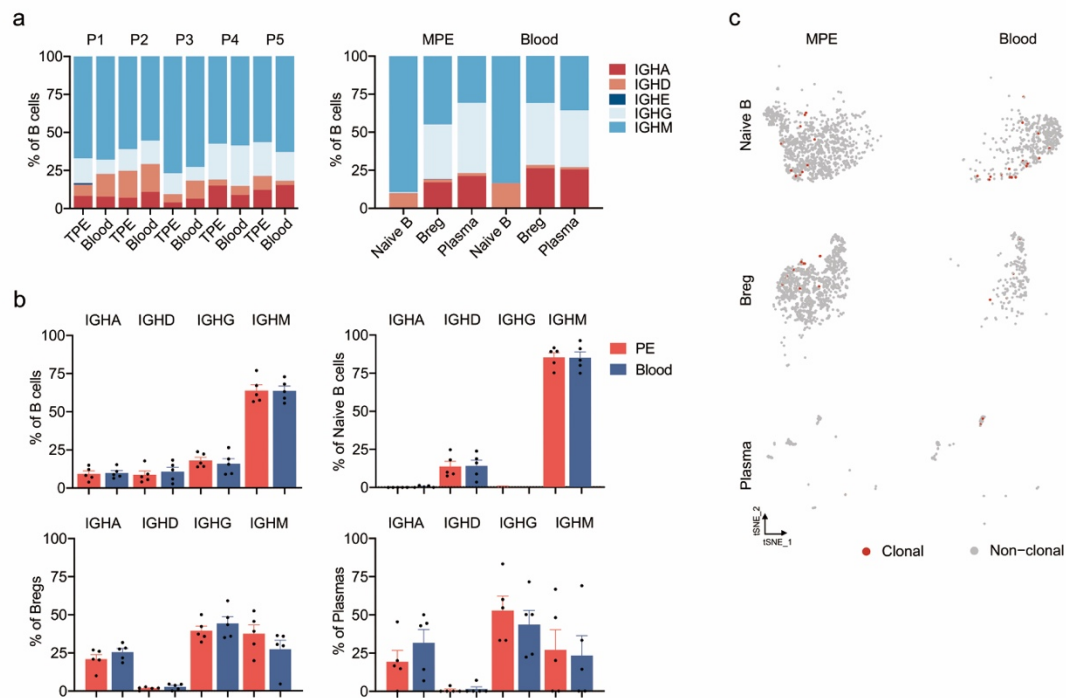

**Supplementary Fig. 4. Clonal expansion of B cells defined by BCR. a**, Fraction of the Ig isotype (IGHA, IGHD, IGHG and IHGM) fraction of each patient (left panel) or cell cluster (right panel). **b**, Frequencies of Ig isotype of total B cells and each cluster in MPE and blood (Data are presented as mean  $\pm$  SD. Comparisons were made using two tailed paired Student's *t*-test, all  $P > 0.05$ . Blood,  $n = 5$  samples, PE,  $n = 5$  samples). **c**, The tSNE plot shows the BCR expansion status in MPE and blood.

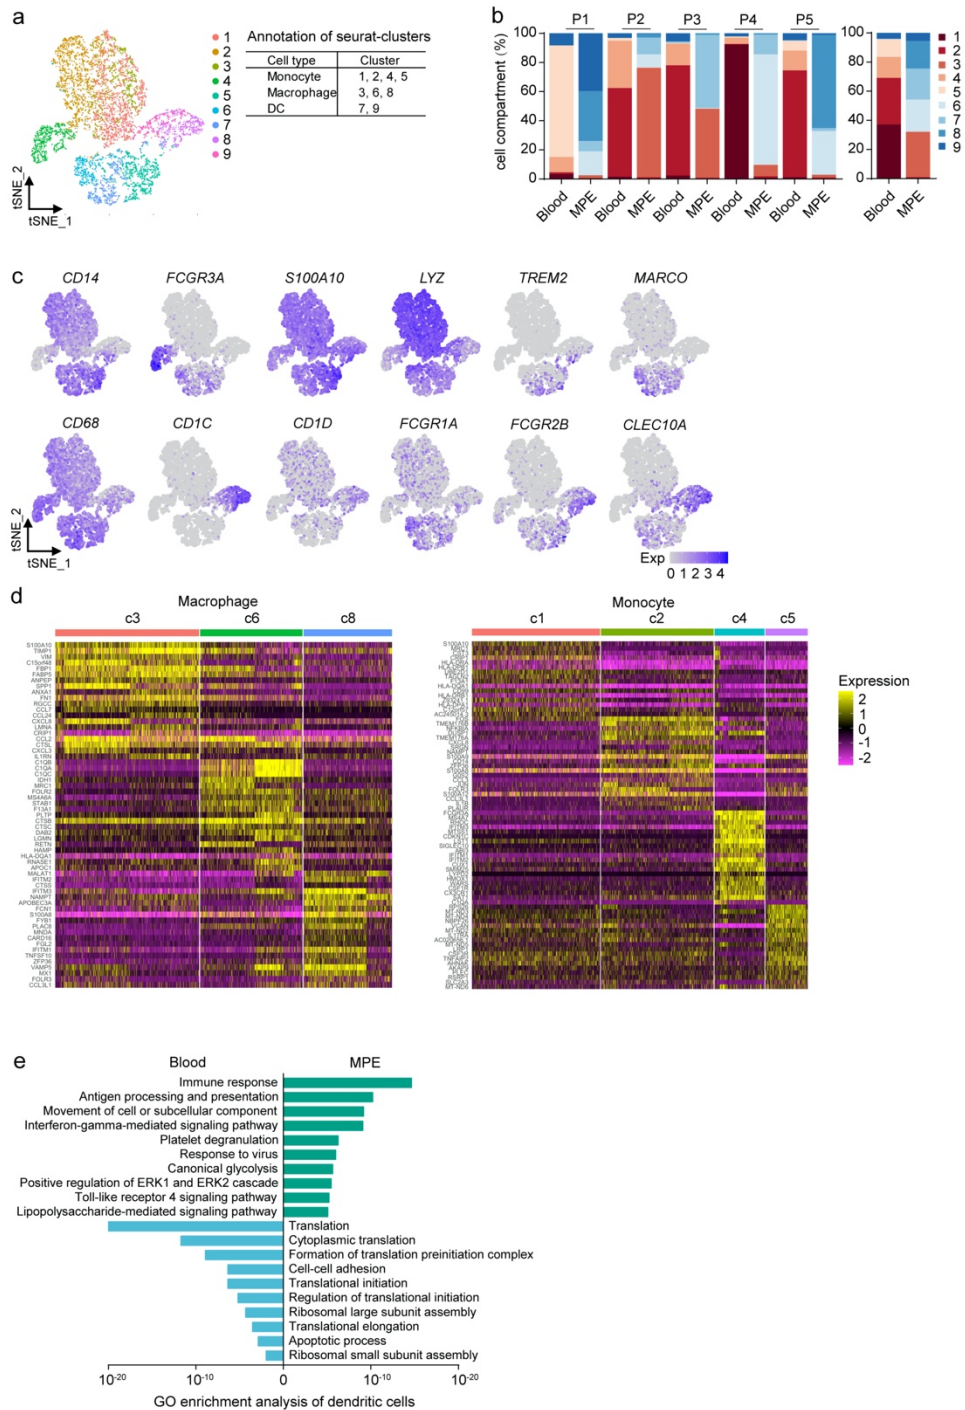

**Supplementary Fig. 5. Single-cell transcriptional profiling of myeloid cells from MPE and blood. a,** tSNE plots of Myeloids and annotation of seurat-clusters with cell subtypes. **b,** Average proportion of each seurat-cluster derived from each patient (left panel), and MPE or blood (right panel). **c,** Canonical cell markers of myeloid cells. Data are colored according to expression levels. **d,** Heatmaps of differentially express genes in monocyte (left panel) or macrophage (right panel). **e,** GO enrichment analysis of differentially express genes between MPE and blood samples in dendritic cell subsets. The significance was by Fisher's exact test and adjusted by Benjamini-Hochberg correction.

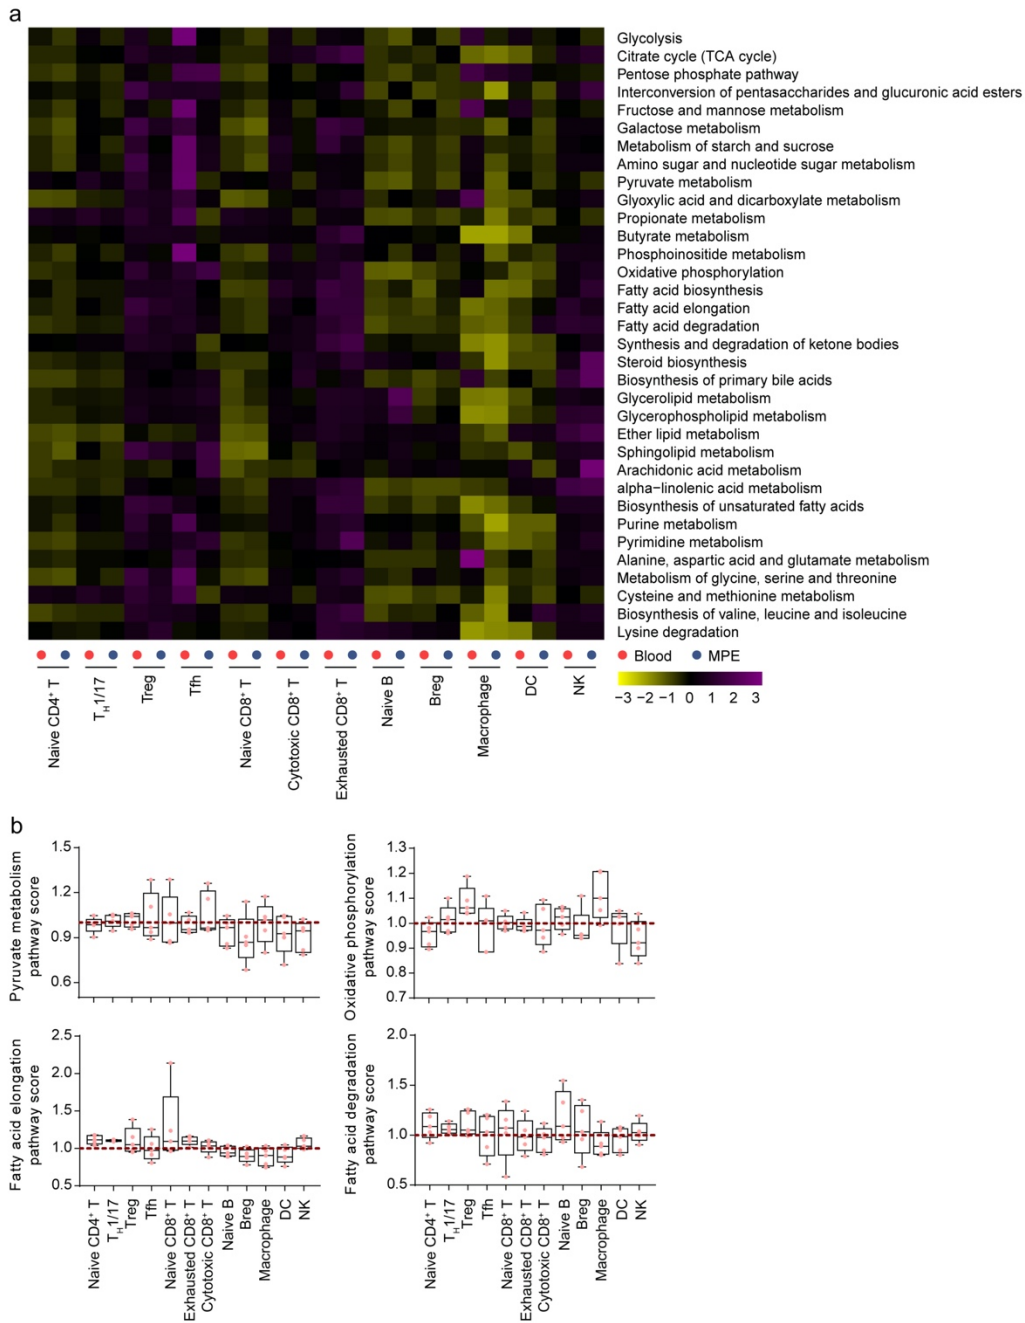

**Supplementary Fig. 6. Metabolic heterogeneity in MPE and blood.** **a**, Heatmap of the average enrichment score of the indicated metabolic pathways in in MPE and blood immune cell subtypes. **b**, Distributions of average enrichment score of the indicated metabolic pathways in MPE immune cell subtypes.  $n = 5$  samples. The box plots were defined by the interquartile range (IQR, the range between the 25% and 75%) and the median, whiskers represent the upper and lower value within 1.5 times the IQR.



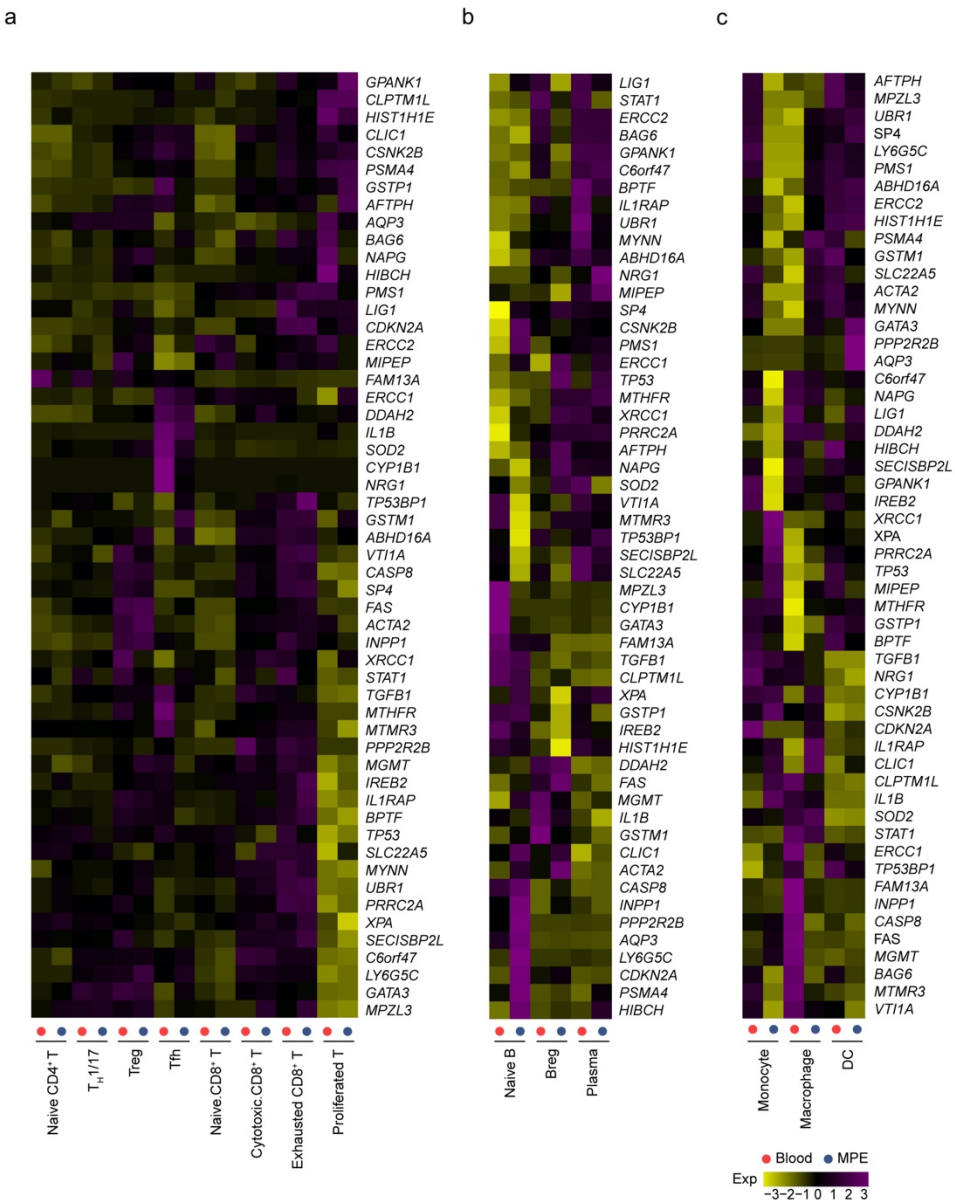

**Supplementary Fig. 7. Cell-type specificity of genes associated with non-small cell lung cancer susceptibility in immune cells from MPE and blood using scRNA-seq.** The heatmaps show the average expression of genes previously indicated in genome-wide association studies of non-small cell lung cancer across (a) T cell subsets, (b) B cell subsets and (c) myeloid cell subsets.

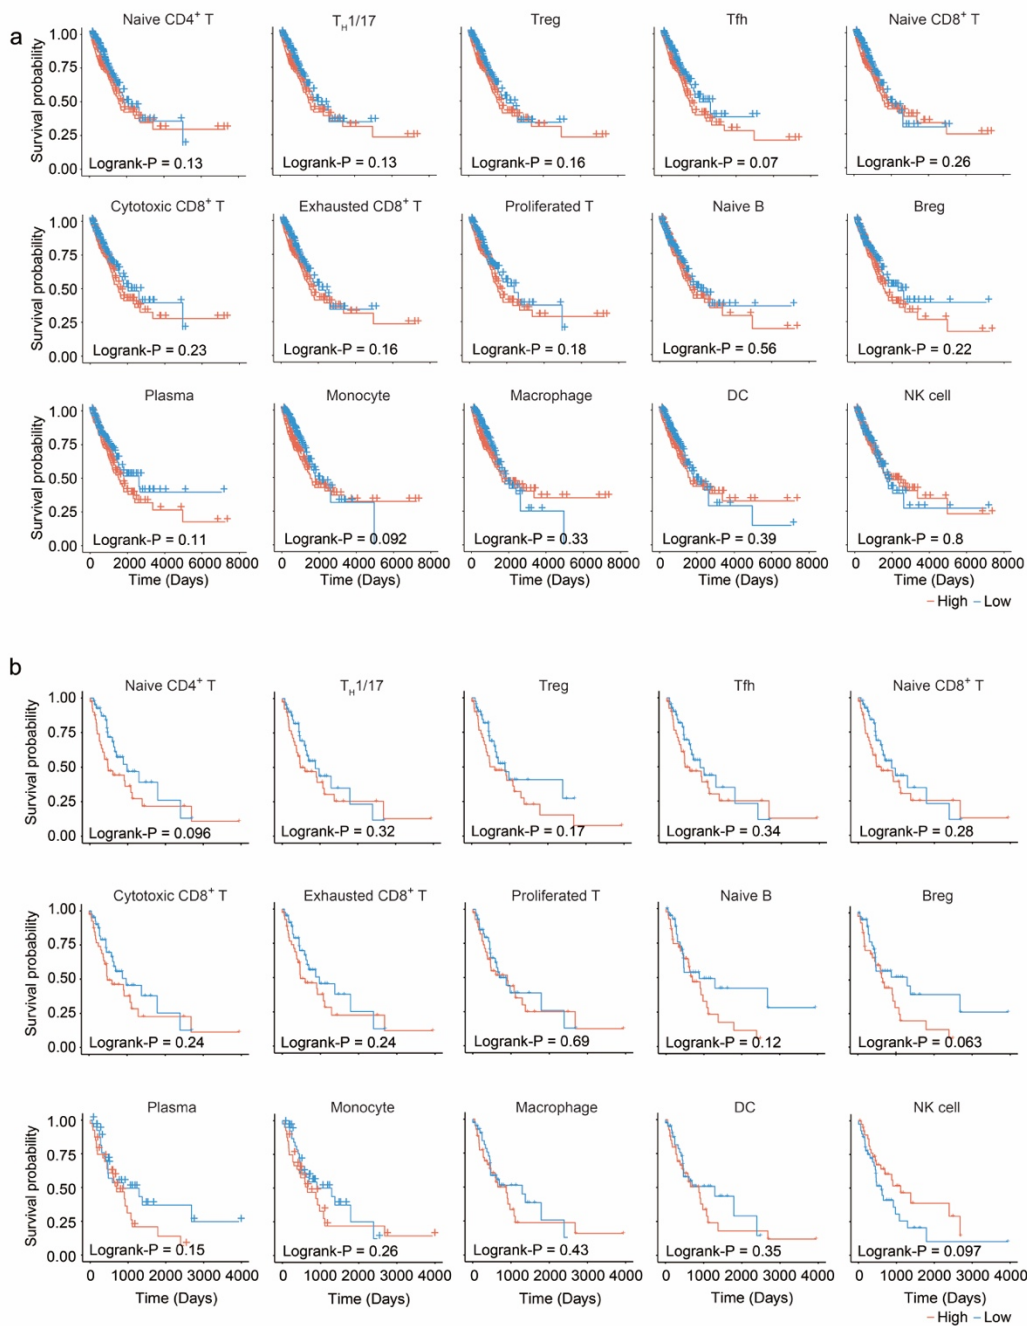

**Supplementary Fig. 8. Survival analysis for signature genes of 15 cell types in The TCGA LUAD data.** The Kaplan-Meier overall survival curves of TCGA LUAD patients (**a**) or TCGA LUAD patients with stage III and IV (**b**) grouped by the gene signature of 15 cell types. The high and low group are divided by the median value of mean expression of signature gene after normalization by CIBERSORT. The significant was calculated using the two-sided log-rank test.

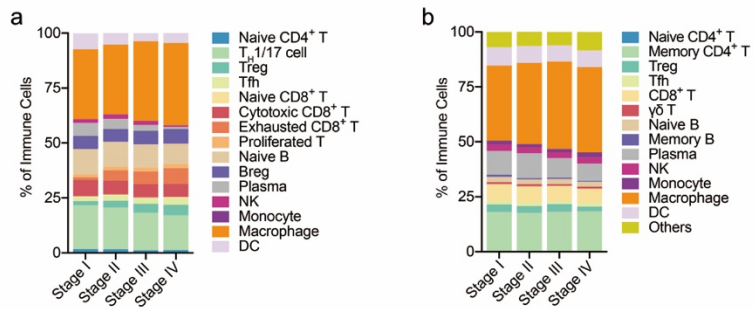

**Supplementary Fig. 9. Proportion of cell types in TCGA LUAD data.** **a**, Proportion analysis in TCGA LUAD data for 15 cell types identified in MPE. **b**, Proportion analysis in TCGA LUAD data for CIBERSORT cell type.

**Supplementary Table 1. Metric information for five MPE patients induced by lung adenocarcinoma**

| Patient ID | Sex    | Age (yr) | Sample Type | Reads         | Genes  | Mean Reads per Cell | Median Genes per Cell | Median UMIs per Cell | Cells (before filtering) | Cells (After filtering) |
|------------|--------|----------|-------------|---------------|--------|---------------------|-----------------------|----------------------|--------------------------|-------------------------|
| P1         | Male   | 68       | Blood       | 1,037,825,378 | 20,068 | 152,598             | 1,560                 | 3,807                | 6,801                    | 5,793                   |
|            |        |          | MPE         | 852,337,548   | 19,782 | 190,296             | 1,560                 | 4,307                | 4,479                    | 4,282                   |
| P2         | Female | 64       | Blood       | 800,604,289   | 19,671 | 138,921             | 1,416                 | 3,525                | 5,763                    | 3,517                   |
|            |        |          | MPE         | 849,787,038   | 20,998 | 143,109             | 1,805                 | 4,396                | 5,938                    | 5,609                   |
| P3         | Male   | 65       | Blood       | 875,444,680   | 20,930 | 106,592             | 1,752                 | 4,356                | 8,213                    | 7,460                   |
|            |        |          | MPE         | 853,575,131   | 21,707 | 103,551             | 1,549                 | 4,668                | 8,243                    | 7,650                   |
| P4         | Male   | 72       | Blood       | 902,217,037   | 19,956 | 107,330             | 1,580                 | 4,223                | 8,406                    | 7,775                   |
|            |        |          | MPE         | 849,451,420   | 21,134 | 97,964              | 1,588                 | 4,573                | 8,671                    | 8,329                   |
| P5         | Male   | 56       | Blood       | 805,098,625   | 20,080 | 154,737             | 1,686                 | 4,721                | 5,203                    | 4,748                   |
|            |        |          | MPE         | 898,216,524   | 21,590 | 116,788             | 1,660                 | 4,640                | 7,691                    | 7,219                   |

MPE = malignant pleural effusion.

**Supplementary Table 2. Gene list in genome-wide association studies related analysis**

| <b>Gene</b> |           |
|-------------|-----------|
| CLPTM1L     | IREB2     |
| TP53        | PSMA4     |
| GSTP1       | MIPEP     |
| GSTM1       | SLC22A5   |
| ERCC2       | BPTF      |
| ERCC1       | PRRC2A    |
| XPA         | HIST1H1E  |
| CYP1B1      | VTI1A     |
| IL1B        | NAPG      |
| XRCC1       | HIBCH     |
| CASP8       | INPP1     |
| MTHFR       | PMS1      |
| FAS         | STAT1     |
| SOD2        | SP4       |
| MGMT        | MYNN      |
| TGFB1       | AFTPH     |
| LIG1        | AQP3      |
| IL1RAP      | NRG1      |
| FAM13A      | CDKN2A    |
| ACTA2       | MPZL3     |
| MTMR3       | SECISBP2L |
| GATA3       | LY6G5C    |
| PPP2R2B     | ABHD16A   |
| BAG6        | CLIC1     |
| C6orf47     | DDAH2     |
| CSNK2B      | UBR1      |
| GPANK1      | TP53BP1   |
