# Supplementary material for: Single-cell analysis of diverse immune phenotypes in malignant pleural effusion
Source: PubMed Central journal article supplement (PMC8602344; doi:10.1038/s41467-021-27026-9), 2021-11-18
Supplement: 41467_2021_27026_MOESM2_ESM.pdf [file 41467_2021_27026_MOESM2_ESM.pdf]

## Description of Additional Supplementary Files

File Name: Supplementary Data 1

Description: The differentially expressed genes of each cell type between malignant pleural effusion and blood.

File Name: Supplementary Data 2

Description: Metabolism pathway signature genes downloaded from KEGG.
